# Supplementary figures and images for: Engineering Corynebacterium glutamicum for isobutanol production
Source: PubMed Central journal article supplement — Appl Microbiol Biotechnol. 2010 Apr 8;87(3):1045–55. doi: 10.1007/s00253-010-2522-6 (PMC2886118; doi:10.1007/s00253-010-2522-6), 2010-04-08

Electronic supplementary  
figure

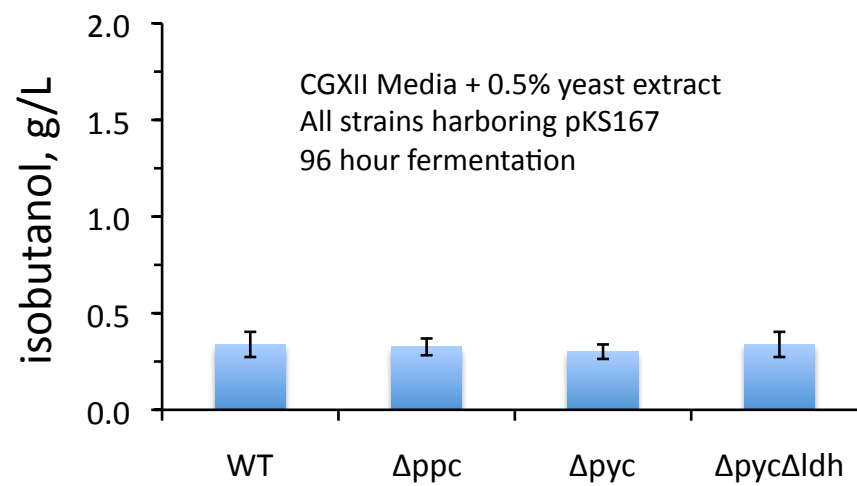

Supplement: 253_2010_2522_MOESM1_ESM.pdf [file 253_2010_2522_MOESM1_ESM.pdf]
